# Supplementary material for: The Occurrence of Coral Species Reported as Threatened in Federally Protected Waters of the US Pacific
Source: Hindawi journal article supplement (doi:10.1155/2011/358687), 2010-10-21
Supplement: f1 [file 358687.f1.xls]

## Sheet: Supplemental Table
Supplemental Table . Occurrence of 75 IUCN Red Listed Coral Species in the U.S. Pacific and in federally protected areas, and data sources used to substantiate the occurrence records. "1" indicates presence; empty cell indicates no record of occurrence. FDP = Farallon de Pajaros; FFS = French Frigate Shoals; P&H = Pearl and Hermes. National Park and Marine Sanctuary name codes are given in Table …
			Marine National Monuments																					National Parks							Marine Sanctuaries		3 Number of units			Printed References	4 Unpublished Data
			Pacific Remote Islands							Rose	Marianas			Papahānaumokuākea
	1 IUCN Red List Category	2 Reviewed U.S. Occurrence Status	Johnston	Howland	Baker	Jarvis	Palmyra	Kingman	Wake	Rose	Maug	Asuncion	FDP	Nihoa	Necker	FFS	Gardner	Maro	Laysan	Lisinski	P&H	Midway	Kure	WAPA	KAHO	PUHE	PUHO	KALA	NPSA Tutuila	NPSA Ofu	FBNMS	HIHWNMS	Monuments	Parks	Sanctuaries
Acanthastrea brevis	VU	A								1																							1	0	0		D. Fenner
Acanthastrea hemprichii	VU	A																															0	0	0		D. Fenner
Acanthastrea ishigakiensis	VU	A																															0	0	0		D. Fenner
Acanthastrea regularis	VU	B																															0	0	0
Acropora aculeus	VU	A					1	1	1																					1			3	1	0	26, 30, 32, 34, 36, 39, 40, 41	J. Maragos, J. Kenyon
Acropora acuminata	VU	A		1	1		1	1	1																					1	1		5	1	1	26, 32, 35, 37, 38, 39, 40, 41	J. Maragos, J. Kenyon
Acropora aspera	VU	A					1	1		1														1						1			3	2	0	26, 28, 29, 30, 32, 34, 36, 40	J. Maragos
Acropora dendrum	VU	C																															0	0	0
Acropora donei	VU	A																												1			0	1	0	39, 40, 41
Acropora globiceps	VU	A					1	1		1																				1			3	1	0	26, 28, 30, 38, 39, 40	J. Maragos
Acropora horrida	VU	A																												1			0	1	0	34, 39, 40, 41
Acropora jacquelineae	VU	A																															0	0	0		D. Fenner
Acropora listeri	VU	A																											1				0	1	0	30, 38, 39, 41
Acropora lokani	VU	C																															0	0	0
Acropora microclados	VU	A			1	1		1																					1				3	1	0	30, 39, 40, 41	J. Maragos
Acropora palmerae	VU	A							1																					1	1		1	1	1	30, 32, 35, 38, 39, 40, 41	J. Kenyon
Acropora paniculata	VU	A	1				1	1		1	1																			1			5	1	0	13, 14, 26, 27, 28, 34, 35, 36, 38, 39, 40, 41	J. Maragos, NOAA PIFSC CRED database
Acropora pharaonis	VU	A																															0	0	0		D. Fenner
Acropora polystoma	VU	A		1	1		1																							1			3	1	0	26, 39, 40, 41	J. Maragos, D. Burdick
Acropora retusa	VU	A	1	1				1		1																				1			4	1	0	28, 39, 40, 41	J. Maragos
Acropora rudis	EN	A																													1		0	0	1		D. Fenner
Acropora speciosa	VU	A						1																									1	0	0		J. Maragos
Acropora striata	VU	A						1																						1			1	1	0	32	J. Maragos, C. Birkeland
Acropora tenella	VU	B																															0	0	0
Acropora vaughani	VU	A		1	1		1	1																						1			4	1	0	26, 32, 35, 37, 39, 40, 41	J. Maragos
Acropora verweyi	VU	A			1	1	1	1			1																		1	1			5	2	0	26, 30, 37, 38, 39, 40, 41	J. Maragos, NOAA PIFSC CRED database
Alveopora allingi	VU	A																											1				0	1	0	32, 33, 34, 35, 36, 38, 39, 40, 41
Alveopora fenestrata	VU	A																															0	0	0	32
Alveopora verrilliana	VU	A					1	1		1																							3	0	0	26, 28, 32, 33, 34	J. Maragos
Anacropora puertogalerae	VU	B																															0	0	0
Anacropora spinosa	EN	B																															0	0	0
Astreopora cucullata	VU	A								1																				1			1	1	0	28, 34, 35, 38	D. Fenner
Barabattoia laddi	VU	A								1																							1	0	0	28
Caulastrea echinulata	VU	C																															0	0	0
Cyphastrea agassizi	VU	A					1					1													1			1				1	2	2	1	11, 12, 13, 14, 15, 26	D. Burdick, NOAA PIFSC CRED database, NPS PIMN database
Cyphastrea ocellina	VU	A	1					1						1	1	1	1	1	1	1	1	1			1	1		1				1	11	2	1	11, 12, 13, 14, 15, 17, 18, 19, 20, 21, 25, 27	J. Maragos, NPS PIMN database
Euphyllia cristata	VU	A																						1									0	1	0	29, 32	D. Burdick, D. Fenner
Euphyllia paraancora	VU	A																															0	0	0		D. Burdick
Euphyllia paradivisa	VU	A																															0	0	0		D. Fenner
Galaxea astreata	VU	A																												1			0	1	0	35, 37,39, 40, 41
Heliopora coerulea	VU	A									1	1												1						1			2	2	0	29, 34, 38, 39, 40, 41	D. Burdick, NOAA PIFSC CRED database
Isopora crateriformis	VU	A																											1	1	1		0	2	1	33, 34, 36, 37, 38, 39, 40, 41
Isopora cuneata	VU	A		1			1																							1			2	1	0	26, 35, 39, 40, 41	J. Maragos
Leptoseris incrustans	VU	A	1			1				1						1					1	1	1				1	1		1		1	7	3	1	12, 13, 14, 15, 27, 28, 32, 35, 38, 39, 40, 41	J. Maragos, NPS PIMN database
Leptoseris yabei	VU	A								1																				1			1	1	0	16, 28, 35, 39, 40, 41
Millepora foveolata	VU	A																															0	0	0	32
Millepora tuberosa	EN	A																											1	1	1		0	2	1	32, 38	D. Fenner
Montipora angulata	VU	A								1																							1	0	0	28
Montipora australiensis	VU	A																												1			0	1	0		C. Birkeland
Montipora calcarea	VU	A								1																			1		1		1	1	1	28, 37, 39, 40, 41
Montipora caliculata	VU	A		1	1	1	1	1			1	1																	1	1	1		7	2	1	26, 32, 34, 35, 37, 38, 39, 40, 41	J. Maragos, NOAA PIFSC CRED database
Montipora dilatata	EN	A					1	1										1															3	0	0	13, 14, 26	J. Maragos
Montipora flabellata	VU	A	1				1	1							1	1	1	1	1	1	1	1	1					1				1	12	1	1	12, 13, 14, 15, 18, 20, 21, 22, 23, 25, 26	J. Maragos, NPS PIMN database
Montipora lobulata	VU	A							1	1																					1		2	0	1	28, 32, 38	J. Kenyon
Montipora patula	VU	A	1				1	1						1	1	1	1	1	1	1	1	1	1		1	1	1	1				1	13	2	1	11, 12, 13, 14, 15, 19, 21, 24, 25, 26	J. Maragos, NPS PIMN database
Pachyseris rugosa	VU	A																															0	0	0	35, 38
Pavona bipartita	VU	A										1																					1	0	0		D. Burdick, NOAA PIFSC CRED database
Pavona cactus	VU	A					1																							1			1	1	0	26, 32, 39, 40, 41
Pavona decussata	VU	A																						1						1			0	2	0	29, 32, 33, 34, 35, 36, 38, 39, 40, 41
Pavona diffluens	VU	A																											1				0	1	0	32, 39, 40, 41
Pavona venosa	VU	A						1		1														1					1	1	1		2	3	1	28, 29, 32, 36, 37, 38, 39, 40, 41	J. Maragos
Pectinia alcicornis	VU	B																															0	0	0
Physogyra lichtensteini	VU	B																															0	0	0
Pocillopora danae	VU	A		1	1	1	1	1			1	1	1											1						1			8	2	0	26, 29, 32, 34, 38, 40, 41	J. Maragos, NOAA PIFSC CRED database
Pocillopora elegans	VU	A	1	1	1	1	1	1	1	1	1	1	1																1		1		11	1	1	26, 28, 32, 38, 39, 40, 41	J. Maragos, J. Kenyon, NOAA PIFSC CRED database
Porites horizontalata	VU	A																											1				0	1	0	32, 33, 34, 37, 38, 39, 40, 41
Porites napopora	VU	A																													1		0	0	1	37
Porites nigrescens	VU	A																												1			0	1	0	35, 36, 39, 40, 41
Porites pukoensis	CR	A						1																									1	0	0	33, 34	J. Maragos
Psammocora stellata	VU	A	1	1			1	1						1		1	1	1	1	1	1	1	1										13	0	0	13, 14, 18, 20, 25, 26, 27, 32	J. Maragos
Seriatopora aculeata	VU	A																															0	0	0	32
Turbinaria mesenterina	VU	A																												1			0	1	0	35, 39, 40, 41
Turbinaria peltata	VU	A																															0	0	0	34, 35	J. Maragos
Turbinaria reniformis	VU	A			1		1	1		1																				1	1		4	1	1	26, 28, 32, 35, 37, 38, 39, 40, 41
Turbinaria stellulata	VU	A					1	1		1		1																		1			4	1	0	26, 28, 32, 35, 39, 40, 41	J. Maragos, NOAA PIFSC CRED database
# Red List species			8	9	9	6	21	24	5	17	6	7	2	3	3	5	4	5	4	4	5	5	4	6	3	2	2	5	12	31	11	5
